AT A GLANCE

# Generating mouse models for biomedical research: technological advances

Channabasavaiah B. Gurumurthy<sup>1,2</sup> and Kevin C. Kent Lloyd<sup>3,4,\*</sup>

**ABSTRACT**

Over the past decade, new methods and procedures have been developed to generate genetically engineered mouse models of human disease. This At a Glance article highlights several recent technical advances in mouse genome manipulation that have transformed our ability to manipulate and study gene expression in the mouse. We discuss how conventional gene targeting by homologous

recombination in embryonic stem cells has given way to more refined methods that enable allele-specific manipulation in zygotes. We also highlight advances in the use of programmable endonucleases that have greatly increased the feasibility and ease of editing the mouse genome. Together, these and other technologies provide researchers with the molecular tools to functionally annotate the mouse genome with greater fidelity and specificity, as well as to generate new mouse models using faster, simpler and less costly techniques.

**KEY WORDS:** CRISPR, Genome editing, Mouse, Mutagenesis

**Introduction**

Researchers are entering a new era of human disease modeling in animals. For many years now, the laboratory mouse (*Mus musculus*) has remained the quintessential research animal of choice for studying human biology, pathology and disease processes (Rosenthal and Brown, 2007; Lloyd et al., 2016). The mouse possesses numerous biological characteristics that make it the most commonly used animal in biomedical research for modeling human disease mechanisms; these characteristics include its short life

<sup>1</sup>Developmental Neuroscience, Munroe Meyer Institute for Genetics and Rehabilitation, University of Nebraska Medical Center, Omaha, NE 68106-5915, USA. <sup>2</sup>Mouse Genome Engineering Core Facility, Vice Chancellor for Research Office, University of Nebraska Medical Center, Omaha, NE 68106-5915, USA. <sup>3</sup>Department of Surgery, School of Medicine, University of California, Davis, CA 95618, USA. <sup>4</sup>Mouse Biology Program, University of California, Davis, CA 95618, USA.

\*Author for correspondence (kclloyd@ucdavis.edu)

ID C.B.G., 0000-0002-8022-4033; K.C.K.L., 0000-0002-5318-4144

This is an Open Access article distributed under the terms of the Creative Commons Attribution License (<https://creativecommons.org/licenses/by/4.0>), which permits unrestricted use, distribution and reproduction in any medium provided that the original work is properly attributed.

**1 Gene targeting in ES cells**  
 Modify a region of DNA → Homologous recombination in embryonic stem cells → Obtain germline transmission from chimera to establish a new line → Transfer to pseudopregnant female → Inject targeted ES cells into blastocyst

**2 Conditional mutagenesis**  
**A Cre-mediated recombination events:** Deletion, Inversion, Translocation. Recombination between loxP sites. Head-to-tail loxP sites on different chromosomes generate chromosomal translocations.  
**B Simple conditional strategy:** Targeting construct: contains an essential exon flanked by loxP sites and endogenous coding sequence homologous to the wild-type allele. Homologous recombination. Conditional allele: homologous recombination generates a conditional allele that can be inactivated in a time or spatially restricted manner by exposure to Cre. Null allele: depending on the placement and orientation of the loxP sites, the null allele can be a deletion, frameshift or nonsense mutation.  
**C Cre recombination in vivo:** Cre expressed in heart tissue only × Cre mouse × loxP mouse. Heart-specific promoter. Ubiquitously expressed conditional allele. Conditional knockout. In all other cells, the target gene is expressed normally.  
**D Knock-out-first strategy:** loxP-tagged allele: contains a splice-acceptor (SA) sequence upstream of a loxP (loxP) reporter gene and a strong polyadenylation (pA) stop sequence flanked by FRT sites. SA can be converted into a loxP-tagged null allele by Cre recombination or into a conditional allele by Flp recombination, which can then be converted into a deletion allele by Cre recombination.  
**E Conditionals by Inversion (COIN):** An essential exon is split by the antisense coding sequence of a selection expression marker cassette (e.g. SA-*ligno-pA*) flanked by mutant loxP (loxP-mut) sites located in mini-exons (2L, 2R). These sites can undergo Cre recombination-mediated inversion to cause COIN allele expression, which is locked in place by a non-reversible loxP and a wild-type loxP site.

**3 Knocking down gene expression using RNAi**  
**A shRNA biogenesis and RNAi:** dsRNA → RISC-loading complex (Dicer, R2D2) → RISC → mRNA recognition → polyA → RNA degradation → Cleared mRNA.  
**B shRNA/amiRNA-expressing transgenes:** Transgene: knockdown models can be generated using a transgene that encodes a functional shRNA or an artificial miRNA (amiRNA) that targets the gene. Transgene inserted via random transgenesis. Inserted at a specific site via ES cell targeting. HI 100 promoter. Targeted insertion of amiRNA into an intrinsic site via Cre-mediated recombination. Gene-specific promoter.

**4 Pronuclear injection (PI)-based transgenesis**  
**A PI-based random transgenesis:** Step 1: Inject DNA construct into zygotes. Step 2: Implant transgenic zygotes into pseudopregnant females. Step 3: genotype founders.  
**B PI-based targeted transgenesis (PIT):** Step 1: use ES cell targeting or CRISPR/Cas9 to generate a seed mouse with a PIT landing pad to obtain germline transmission. Donor vector: contains a PIT landing pad (IT217, I202) and a Cre or PhC131 integrase. Step 2: Inject seed mouse zygote with donor vector. Step 3: the I202 inserts in the PIT landing pad via Cre-mediated recombination-mediated cassette exchange. The PIT injection mix consists of: (i) a donor plasmid containing DNA of interest (DOA), and (ii) an mRNA encoding Cre (or PhC131) integrase.

**5 Genome editing with programmable endonucleases**  
 Transcription activator-like effector nucleases (TALENs), Zinc-finger nucleases (ZFNs), CRISPR/Cas9 system. Programmable nucleases consist of a DNA-binding component (ZF, TALE, sgRNA) and a nuclease (FokI, Cas9), which induce double-strand breaks (DSBs) at specific genomic loci.  
 No donor DNA: imprecise NHEJ repair leads to a frameshift mutation. With donor DNA: gCODN, Transgenic DNA cassette, Fused cassette, RNAi expression cassette. Point mutations can be introduced via HDR from a single-stranded donor oligodeoxynucleotide (ssODN). Fused cassettes can be introduced into DSB and mutations generated when the mice are then crossed to a Cre-expressing line. miRNA/amiRNA cassettes can be introduced via a transgene to knockdown a specific transcript.

**Glossary**  
 Blastocyst: an early stage (3-5 days post-fertilization) multicellular mouse embryo, which contains an inner mass of cells, a fluid-filled central cavity and an outer trophoblast cell layer.  
 Conditional allele: an engineered allele that can be turned off (or on) in an embryonic or conditional manner. For example, by Cre-mediated recombination of genomic sequences.  
 Cre/Flp: a molecular recombination system that consists of a site-specific recombinase protein (Cre) that binds to specific, non-coding, 34-nucleotide target sequences (loxP).  
 Homology-directed repair (HDR): a DNA repair process involving the use of a single-stranded donor DNA template with short regions of homology (up to 300 base pairs) as a donor template to fix the cut ends of double-stranded DNA breaks created by programmable nucleases.  
 Non-homologous end joining (NHEJ): a DNA repair mechanism that joins DNA ends following a double-strand break. Because the two ends are generally not homologous to each other, the process is termed non-homologous end joining.  
 Pronucleus: the structure in a one-cell stage mouse embryo that contains the nucleus of the sperm and egg before their nuclear fusion.  
 Pseudopregnant female: the state of "false" pregnancy, created when a female in estrus is mated with a vasectomized male to induce the hormonal changes that stimulate pregnancy in the absence of fertilized embryos.  
 Short hairpin RNA (shRNA): a short or small RNA molecule with a hairpin loop used to silence gene expression by causing the degradation of the target mRNA.  
 Transgenic mouse: a genetically engineered mouse created by the homologous recombination (HDR), which typically inserts a DNA fragment into the genome.

cycle, gestation period and lifespan, as well as its high fecundity and breeding efficiency (Silver, 2001). Another key advantage is its high degree of conservation with humans, as reflected in its anatomy, physiology and genetics (Justice and Dhillon, 2016).

The highly conserved genetic homology that exists between mice and humans has justified the development of technologies to manipulate the mouse genome to create mouse models to reveal the genetic components of disease. It is important to note that, as technologies for genetic engineering and phenotypic analysis have advanced, some studies using mouse models have struggled to accurately predict human disease pathogenesis and clinical response to drug therapy (Perrin, 2014). For these reasons, it is essential to apply scientific principles of rigor and reproducibility (Kilkenny et al., 2010; Karp et al., 2015) when designing and conducting experiments to associate mouse genes with human phenotypes at a systems level (Perlman, 2016).

Early mouse genetics research relied on mice having visible physical defects and readily measurable phenotypes, such as those caused by random spontaneous or induced mutations (Russell et al., 1979; Justice, 1999). This ‘forward genetics’ approach depends on the presence of a phenotype to guide the search for the underlying genetic mutation. With the advent of techniques that enabled molecular cloning and the use of recombinant DNA to efficiently manipulate mouse genomes, researchers no longer needed to search for a relevant phenotype. Instead, they could engineer a pre-determined specific mutation into the mouse genome in real time in pluripotent mouse embryonic stem (ES) cells (Gordon and Ruddle, 1981; Gordon et al., 1980; Palmiter et al., 1982; Thomas and Capecchi, 1986, 1987). This ‘reverse genetics’ approach enabled scientists to study the phenotypic consequences of a known specific genetic mutation. This approach can generate ‘knockout’ mice (see Box 1 for a glossary of terms) by genetically manipulating the genome of ES cells, and then injecting the targeted cells into morulae or blastocysts (Box 1), which are then implanted into pseudopregnant female mice (Box 1). The resulting chimeric embryos develop into offspring that bear the desired gene deletion. After backcrossing to test for germline transmission of the knockout allele and subsequent intercrossing to achieve homozygosity, the phenotypic consequences of the mutation can be assessed. Phenotypes can also be assessed in transgenic mice (Box 1), which are generated by introducing an exogenous gene via microinjection into the one-cell-stage zygote. When successful, these genetic manipulations can also undergo germline transmission to the next generation (Palmiter et al., 1982; Brinster et al., 1989).

With the sequencing of the mouse and human genomes (Venter et al., 2001; Mouse Genome Sequencing Consortium, 2002), attention soon turned to determining the function of protein-coding genes (Nadeau et al., 2001). A growing number (~6000) of inherited disease syndromes (<https://www.omim.org/statistics/geneMap>) further motivated efforts to functionally annotate every human gene and to determine the genetic basis of rare, simple and common complex human diseases using mouse models. Mouse models are thus vitally important for elucidating gene function. Those that express the pathophysiology of human disease are an essential resource for understanding disease mechanisms, improving diagnostic strategies and for testing therapeutic interventions (Rosenthal and Brown, 2007; Bradley et al., 2012; Justice and Dhillon, 2016; Meehan et al., 2017). Even mouse models that only partially recapitulate the human phenotype, such as mutations in individual paralogs, can still provide important insights into disease mechanisms.

In this At a Glance article, we review recent technological advances for generating new and improved mouse models for

biomedical research. This article aims to update a previous poster published in this journal several years ago (Justice et al., 2011). This earlier article discussed the role of natural variation, random transgenesis, reverse genetics via ES-cell-derived knockouts, forward genetics via ethylnitrosourea (ENU)-induced chemical mutagenesis, and genetic manipulation using transposons in the generation of mouse models. Many technological advances have since emerged, leading to refinements and improvements in the generation of more precise mouse models. These new technologies overcome some of the limitations of earlier mouse models by adding specificity, reproducibility and efficiency to the generation of alleles that can expand our knowledge of disease pathogenesis. For example, the ability to generate mouse models that recapitulate the single-nucleotide variants (SNVs) found in humans will enable us to differentiate between disease-causing and disease-associated mechanisms (Hara and Takada, 2018).

In the poster accompanying this article, we feature four areas of advancement:

- (1) conditional mutagenesis strategies in mouse ES cells;
- (2) gene function knockdown using RNA interference (RNAi);
- (3) targeted transgenesis in zygotes (Piedrahita et al., 1999; Shen et al., 2007) via homologous recombination (Box 1) in ES cells; and
- (4) the use of programmable endonucleases (Box 1) in zygotes, to edit and manipulate the mouse genome in ways not previously possible.

These technologies represent a new paradigm in our ability to manipulate the mouse genome. However, as we discuss, these approaches are not without limitations. For example, the success of conditional mutagenesis can be hampered by poor gene-targeting efficiency in ES cells and by the limited production of germline-competent chimeras (Box 1) that can transmit the mutant allele to subsequent generations in their germline. Furthermore, protein expression can be highly variable following mRNA knockdown by RNAi, which can make experimental reproducibility a challenge. The major limitations of programmable endonucleases, the latest genome-editing tools, is mosaicism and their potential, albeit addressable, problem of inducing off-target mutations. Nonetheless, such pitfalls do not detract from the versatility that these newer technologies afford for manipulating the mouse genome.

### Conditional mutagenesis strategies in mouse ES cells

The most common form of mouse genetic manipulation is the creation of gene knockout models. Gene-targeting in mouse ES cells was pioneered in the late 1980s and was first used to generate ubiquitous knockout models, in which the gene is deleted in every cell (Thomas and Capecchi, 1987; Thompson et al., 1989). We refer readers to the previous At a Glance article on modeling human disease in mice (Justice et al., 2011) for details on how to use gene targeting (Box 1) to generate simple deletion and/or conditional alleles (Box 1) in ES cells to generate whole-body and tissue-specific knockout mice, respectively. In this article, we focus on the generation of more-complex alleles in ES cells (Poster panel 1) that retain wild-type expression and are amenable to conditional, tissue-specific and/or time-dependent deletion. This approach is particularly necessary for manipulating the approximately 30% of genes that affect the viability of homozygous mutants when deleted (Dickinson et al., 2016). For example, embryonic lethality caused by the deletion of the coding regions of *Mix11* (Pulina et al., 2014), *ErbB4* (Gassmann et al., 1995) or *Brca1* (Xu et al., 1999) can be rescued by conditional mutagenesis. This generates models that can be used to investigate specific gene-dependent processes during mammalian embryogenesis (Pulina et al., 2014), neurodevelopment

**Box 1. Glossary**

**Blastocyst:** an early-stage (3.5 days post-fertilization) multicellular mouse embryo, which contains an inner mass of cells, a fluid-filled central cavity and an outer trophoblast cell layer.

**Chimera:** a founder mouse that contains a mix of gene-targeted, embryonic stem (ES)-cell-derived cells and host blastocyst-derived cells, typically identified by the contribution of the two different genetic backgrounds of somatic cells to its coat color.

**Conditional alleles:** an engineered allele that can be turned off (or on) in an exogenously controlled manner; for example, by recombinase-mediated deletion of genomic sequences.

**Cre/loxP:** a molecular recombination system that consists of a bacteriophage-derived recombinase protein (Cre) that binds to specific, non-mammalian, 34-nucleotide target sequences (*loxP*).

**Footprint-free point mutations:** an induced mutation that is created without changes being made to untargeted sequences and without leaving exogenous DNA in place.

**Gene targeting:** the methods used to make sequence changes to a specific gene rather than making random sequence changes; for example, gene targeting can be used to inactivate a gene.

**Homologous recombination:** a natural DNA recombination process that occurs, for example, during meiosis and DNA repair, in which similar or identical DNA sequences are exchanged between two adjacent strands of DNA.

**Homology-directed repair (HDR):** a DNA repair process involving the use of a single-stranded donor DNA template with short regions of homology (typically 30-60 bases long) as a donor template to fuse the cut ends of double-stranded DNA breaks created by programmable nucleases.

**Knock-down mouse:** a genetically altered mouse in which gene expression is lowered or silenced by using RNAi to degrade the mRNA of that gene.

**Knock-in mouse:** a genetically altered mouse in which a new mutation is introduced into an endogenous gene or an exogenous gene is introduced using genetic-engineering technologies.

**Knockout mouse:** a genetically altered mouse in which an endogenous gene is deleted and/or inactivated using genetic-engineering technologies.

**loxP-stop-loxP:** a commonly used DNA cassette, containing a stop codon flanked by *loxP* sites, included between the promoter and the coding sequences, to prevent expression of the coding sequence until the stop codon is excised by Cre-mediated recombination.

**Morula:** an early-stage (2.5 days post-fertilization) pre-implantation mouse embryo, typically consisting of 4-8 blastomeres.

**Non-homologous end joining (NHEJ):** a DNA repair mechanism that joins two DNA ends following a double-stranded break. Because the two ends are generally not homologous to each other, the process is named non-homologous end joining.

**Programmable endonuclease:** an enzyme that, when coupled with molecular targeting elements (e.g. a guide RNA), creates site-specific double-stranded DNA breaks.

**Pronuclei:** the structure in a one-cell-stage mouse embryo that contains the nucleus of the sperm and egg before these nuclei fuse.

**Pseudopregnant female:** the state of 'false' pregnancy, created when a female in estrus is mated with a vasectomized male to induce the hormonal changes that simulate pregnancy in the absence of fertilized embryos.

**Recombinase-mediated cassette exchange (RMCE):** a DNA integration strategy that uses site-specific recombinases, such as Cre or Flp, to exchange a DNA segment from one DNA molecule to another. Both the donor and target sequence are flanked by site-specific recombination sites, such as *loxP* or *FRT*. Double reciprocal recombination between these sites brings about DNA exchange.

**Safe-harbor sites:** a genomic locus that, when genetically manipulated, neither interferes with the expression of an integrated transgene nor disrupts endogenous gene activity.

**Short hairpin (sh)RNA:** a short or small RNA molecule with a hairpin loop used to silence gene expression by causing the degradation of the target mRNA.

**Small interfering (si)RNA:** a short or small linear RNA molecule used to interfere with, or to silence, gene expression by causing the degradation of the target mRNA.

**Transgenic mouse:** a genetically engineered mouse created by the pronuclear injection of recombinant DNA (transgene), which typically inserts at a random location in the genome.

(Golub et al., 2004) and breast cancer (Shakya et al., 2008) when combined with an appropriate *Cre*-expressing line that enables tissue- or developmental-stage-specific gene deletion (Dubois et al., 2006).

The versatility of naturally occurring recombinase-enzyme-target-sequence systems, such as *Cre/loxP* (Box 1) and *Flp/FRT*, which derive from bacteria and yeast, respectively, have been adapted to create tools for manipulating mammalian genomes (Gu et al., 1994; Rajewsky et al., 1996; Dymecki, 1996). These tools have dramatically expanded the types and varieties of alleles that can be designed to study gene function *in vivo* (Dymecki, 1996; Nagy, 2000; Nern et al., 2011). A fundamental principle of conditional mutagenesis is the ability to efficiently and reliably convert a functional allele into a mutant one in a specific cell type (called tissue-specific conditional mutagenesis) and/or at a specific time point during development (called time-specific or 'inducible' conditional mutagenesis).

Numerous strategies using recombinase-enzyme-target-sequence systems have been developed for conditional mutagenesis (Marth, 1996). Common to all these strategies is the use of short palindromic recombinase target sequences to flank a specific region of a gene (e.g. a critical coding exon common to all transcripts). Such sequences include the Cre-associated *loxP* sequence (to generate a 'floxed' allele) or the Flp-associated *FRT* sequence (to generate an '*FRT*'-flanked allele) (Bouabe and Okkenhaug, 2013). In the absence of the associated recombinase enzyme, these flanking sequences have no effect on normal transcription nor on the expression of the endogenous gene. However, when exposed to the recombinase, the flanking recombinase target sequences recombine with each other to excise or invert the critical coding exon, depending on their orientation and positioning (McLellan et al., 2017) (Poster panel 2A). In its simplest use, if two flanking recombinase target sequences are placed in an asymmetrical head-to-tail orientation, they will recombine to delete the intervening genetic sequence upon exposure to recombinase. Alternatively, if pairs of target sequences are positioned symmetrically in a head-to-head orientation, their recombination will invert the intervening sequence. If target sequences are located on different chromosomes, recombination results in a chromosomal translocation.

There are different ways to elicit recombination. For example, as shown in Poster panel 2B, when a mouse that expresses a floxed allele is mated with a transgenic mouse that expresses the recombinase gene, its progeny will express the recombined allele (Gu et al., 1994). The tissue(s) in which the allele is recombined will depend on the expression pattern of the recombinase, i.e. where the promoter is activated to drive tissue-specific expression of the recombinase. Recombination can also be induced by the *in vitro* treatment of embryos or tissues with cell-permeable recombinase protein, or via the delivery of viral vectors that express the recombinase (Chambers et al., 2007; Lewandoski et al., 1997; Su et al., 2002). Recombinase activity can also be targeted to particular tissues by driving the expression of a recombinase from a cell-specific promoter. Recombinase expression can also be induced by expressing the recombinase from an inducible (e.g. drug-responsive) promoter (Sauer, 1998).

The simplest example of the recombinase-enzyme-target-sequence system is shown in Poster panel 2C. This panel shows a molecular targeting construct in which the critical coding exon is flanked by *loxP* sites. The construct also contains a contiguous endogenous coding sequence of between 3 and 8 kb that is homologous to the wild-type allele. This construct is then introduced into ES cells, for example by electroporation, where it

then replaces, via homologous recombination, the endogenous wild-type allele (Hadjantonakis et al., 2008). The conditional allele can then undergo recombination upon exposure to the recombinase to delete the intervening critical coding exon, thereby inhibiting gene expression (null allele).

Another strategy, termed ‘knockout-first’, uses a variation of gene targeting to create a highly versatile allele that combines both gene trap (Friedel and Soriano, 2010) and conditional gene targeting (Jovicić et al., 1990) to generate a *lacZ*-tagged knockout allele (Testa et al., 2004) (Poster panel 2D). The ‘knockout-first’ allele is generated by inserting an *FRT*-flanked gene-trap vector, which contains a splice-acceptor sequence upstream of a *lacZ* reporter gene and a strong polyadenylation stop sequence, into an upstream intron. This creates an in-frame fusion transcript that will disrupt the expression of the targeted allele. Additionally, an adjacent exon coding sequence is flanked with *loxP* sites (Rosen et al., 2015). This allele can then be converted into a null allele by Cre to abrogate gene expression or into a conditional allele by Flp, which can subsequently be converted by Cre into a null allele (Testa et al., 2004; Skarnes et al., 2011). The knockout-first strategy is versatile because it uses a single targeting vector to monitor gene expression using *lacZ* and tissue-specific gene function using Cre, thereby avoiding embryonic lethality. This strategy has been used effectively to enable the rapid and high-throughput production of thousands of gene knockouts in mouse ES cells in large-scale, genome-wide targeted mutagenesis programs, such as the International Knockout Mouse Consortium (IKMC) (Bradley et al., 2012). Hundreds of mutant mouse models of human genetic diseases have been generated using the knockout-first strategy, including models of skin abnormalities (Liakath-Ali et al., 2014), bone and cartilage disease (Freudenthal et al., 2016), and age-related hearing loss (Kane et al., 2012).

Lastly, an elegant technique termed ‘conditionals by inversion’ (COIN) employs an inverted COIN module that contains a reporter gene (e.g. *lacZ*) flanked by mutant recombinase target sites (*lox66* and *lox71*) positioned in a head-to-head orientation to enable inversion by Cre recombinase (Albert et al., 1995) inserted into the anti-sense strand of a target gene (Economides et al., 2013) (Poster panel 2E). Cre ‘flips’ the COIN module into the sense strand, interfering with and inhibiting target-gene transcription while activating the reporter. The COIN approach is particularly applicable to single-exon genes and to genes in which the exon–intron structure is not clearly defined. This approach has been used to model an angiogenesis defect in delta-like 4 (*Dll4*) knockout mice (Billiard et al., 2012) and to generate immunological phenotypes in interleukin 2 receptor, gamma chain (*Il2rg*) knockout mice (Economides et al., 2013).

### Gene expression knockdown using RNAi

About two decades ago, researchers observed that the introduction of double-stranded RNA (dsRNA) that was homologous to a specific gene resulted in its posttranscriptional silencing (Fire et al., 1998). This dsRNA-induced gene silencing was termed RNA interference (RNAi), and it occurs via two main steps (Poster panel 3A). First, Dicer, an enzyme of the RNase III family of nucleases, processes the dsRNA into small double-stranded fragments termed siRNAs (small interfering RNAs; Box 1). Then, the siRNAs are incorporated into a nuclease complex called RISC (for RNA-induced silencing complex), which unwinds the siRNA and finds homologous target mRNAs using the siRNA sequence as a guide; this complex then cleaves the target mRNAs. In the early 2000s, some groups explored whether RNAi could be used to reduce (or

‘knock down’) gene expression in mice by creating transgenic mice that express siRNA (Poster panel 3B). The first proof-of-principle for gene knockdown was demonstrated by delivering lentivirus particles expressing siRNA into green fluorescent protein (GFP) transgenic mice to knock down GFP (Tiscornia et al., 2003). Subsequently, knockdown mice were generated using standard pronuclear injection of constructs that express short-hairpin RNAs (shRNA; Box 1) (Chang et al., 2004; Peng et al., 2006; Seibler et al., 2007; Dickins et al., 2007). Some examples of transgenic knockdown disease models include: an *Abca1*-deficient mouse line that mimics Tangier disease (Chang et al., 2004); insulin receptor (*Insr*)-knockdown mice that develop severe hyperglycemia within 7 days (Seibler et al., 2007); and the reversible knockdown of *Trp53* as a model useful for tumor regression studies (Dickins et al., 2007).

The advantage of the RNAi knockdown strategy over traditional methods for generating knockout mice is that it provides a rapid and inexpensive approach by which to selectively and, in some cases, reversibly block the translation of a transcript. Although knockdown models can be generated more quickly and cheaply than gene-targeted knockout models (Liu, 2013), a key disadvantage of a knockdown is that transcript inhibition can be variable and transient, and therefore less reliable and reproducible than a knockout. The effects of random insertion, together with varying levels of RNAi in different cells within a tissue, were among the most common pitfalls associated with using RNAi technology to modify mouse gene expression (Peng et al., 2006; Yamamoto-Hino and Goto, 2013).

Because of such challenges, and due to the lack of success in generating reliable transgenic RNAi models, this approach did not gain the expected popularity. Alternative strategies were developed to overcome the effect of randomly inserted RNAi constructs by targeting the knockdown cassettes to safe-harbor sites (Box 1), such as the *Gt(ROSA)26Sor* locus (Kleinhammer et al., 2010) or the *Col1a1* locus (Premisrirut et al., 2011). These strategies also include making the system modular by incorporating features such as: (i) the Flp-*FRT* recombinase-mediated cassette exchange (RMCE; Box 1), which facilitates the insertion of a single-copy expression cassette; (ii) a fluorescence reporter that enables gene expression analysis; (iii) microRNA (miRNA) architectures, such as miR30 with reduced general toxicity (McBride et al., 2008); and (iv) tetracycline-inducible elements to enable the expression of the RNAi cassettes upon doxycycline administration (Chang et al., 2004; Seibler et al., 2007). A few models that are useful for cancer research have been generated using these approaches, such as *Pax5* and *eIF4F* knockdown models for leukemia (Lin et al., 2012; Liu et al., 2014). However, interest in generating knockdown models, as well as in using ES-cell-based gene targeting, began to wane with the development of programmable nuclease technologies (as discussed later).

More recently, an elegant approach that combines the use of the RNA-guided Cas9 nuclease system with RNAi technology has been developed to generate knockdown mouse models by inserting the knockdown cassettes into the intronic sites of endogenous genes (Miura et al., 2015). With this method, a single-copy artificial miRNA against the *Otx2* gene was inserted into intron 6 of the *Eef2* gene to knock down *Otx2* in mid-gestation mouse embryos. This strategy was also used to conditionally activate knockdown cassettes using unidirectional recombinase-mediated inversion of the shRNA cassette. The Miura et al. method offers a feasible and simple strategy to generate gene knockdown models because: (i) it uses an endogenous promoter, unlike other knockdown approaches that require an exogenous promoter to drive the RNAi cassette; (ii) the knockdown cassette is inserted as a single copy at a known

site in the genome, unlike approaches that randomly insert the cassette with no control over the number of copies inserted or the number of genomic insertion sites; and (iii) the transgene is not susceptible to silencing, in contrast to other transgenes that are often silenced following random genomic integration.

### Pronuclear injection-based transgenesis

Traditional transgenic methods developed over three decades ago involve the injection of linearized DNA expression cassettes into fertilized zygotes (Gordon et al., 1980; Palmiter et al., 1982) (Poster panel 4A). Some of the most commonly used transgenic DNA expression cassettes include: (i) cDNA encoding the wild-type or mutant allele; (ii) inducible reporter cassettes, such as the *loxP*-stop-*loxP* reporter (Box 1), that incorporate markers such as *lacZ* or the fluorescent reporters GFP, red fluorescent protein (RFP) or tdTomato; (iii) recombinases, such as Cre (Gu et al., 1994), tamoxifen-inducible Cre (CreERT2) (Feil et al., 1996) and Flp (Dymecki, 1996); and (iv) transcriptional inducers, such as tetracycline transactivators (*tTA*) or reverse tetracycline transactivators (*rtTA*) (Gossen and Bujard, 1992).

To produce transgenic mice, a DNA construct is microinjected into the pronuclei (Box 1) of one-cell-stage zygotes (Bockamp et al., 2008). All or part of the injected DNA then inserts randomly at one or more genomic loci as either a single or as multiple (e.g. tandem-repeat) copies. The suitability of this approach for generating animal models is limited by the uncertainty of obtaining a desired level of gene expression due to the random nature of transgene insertion and copy number (Chiang et al., 2012). As a result, ES-cell-based methods were developed to target expression cassettes (such as those encoding Cre) into a specific locus in the genome; for example, the *Gt(ROSA)26Sor* locus, which enables the ubiquitous expression of an inserted transgene (Soriano, 1999). Depending on the construct and insertion site, transgene expression could be driven by a target gene's endogenous promoter and/or by other regulatory elements (Rickert et al., 1997). In this way, an intact, single-copy transgene becomes integrated into a predetermined genomic location in ES cells via homologous recombination, thereby optimizing transgene expression (Rickert et al., 1997; Soriano, 1999). The targeted ES cells are then introduced into morulae or blastocysts, as previously explained, before being implanted into pseudopregnant females. Although this approach overcomes some of the constraints inherent to random transgenesis (such as high variability of gene expression, and difficulty in obtaining the desired transgene expression patterns and levels), homologous recombination has technical hurdles of its own that make it expensive, labor intensive and time consuming. In addition, germline transmission of the exogenous allele can fail, creating a frustrating struggle for researchers who need to reliably and regularly manipulate the mouse genome (Ohtsuka et al., 2012a). Another disadvantage of the ES cell targeting approach is that ES cell genomes do not always remain stable in culture, and can undergo changes before and after gene targeting (Liang et al., 2008).

The recently developed targeted transgenic technologies enable the integration of single-copy transgenes at specific loci in the genome, directly via pronuclear injection. In pioneering work, Masato Ohtsuka and co-workers developed a method called pronuclear injection-based targeted transgenesis (PITT) (Ohtsuka et al., 2010), which allows a single copy of a complete transgene to be precisely inserted at a desired genomic locus in the zygote (Poster panel 4B). The PITT method involves two steps. First, a landing pad (for example, a cassette containing a combination of mutant *loxP* sites) is inserted at a defined locus in ES cells to generate a 'seed'

mouse strain. Second, the PITT components – a donor plasmid containing the DNA of interest (DOI) and a Cre source (either plasmid or mRNA) – are injected into fertilized eggs collected from the seed strain mice. The DOI inserts at the landing pad via recombination-mediated cassette exchange (RMCE). The landing pad and the donor DNA contain compatible sequence elements that enable the donor DNA to insert precisely into the target locus. In the first report (Ohtsuka et al., 2010), the authors employed a well-established Cre-*loxP* system (as the components of the landing pad and the donor plasmid elements) to achieve RMCE. Soon after the first description of the PITT technology, another group reported a similar approach using the PhiC31 integrase and *attP/B* system, which correspond to the landing pad components and donor plasmid elements (Tasic et al., 2011). This modified method to achieve targeted transgenesis was named Targatt™ (Chen-Tsai et al., 2014). The main advantages of the various targeted transgenesis methods that use either Cre-*loxP* recombination or PhiC31-*attP/B* integration, are that: (i) they overcome the problems associated with random transgene insertion, such as fragmented insertion of the transgenes, multicopy insertions, transgene silencing or interference in the expression of the endogenously disrupted gene; and (ii) they resolve the time and cost limitations associated with ES-cell-based approaches by targeting DNA cassettes to specific sites in the genome.

In initial reports of the PITT method, the Cre recombinase was encoded by a plasmid, and the plasmid DNA was injected into the pronuclei of zygotes together with the donor DNA. This method has since been improved by: (i) the use of Cre mRNA instead of plasmid DNA, which was done because plasmid DNA needs to be transcribed, which delays the expression of Cre, by which time the donor DNA might have degraded (Ohtsuka et al., 2012b); (ii) the development of new PITT-compatible donor vectors (Ohtsuka et al., 2012b); and (iii) the development of a seed mouse strain that contains both Cre-*loxP* and PhiC31-*attP/B* cassette insertion systems, providing researchers with the flexibility to use either (Ohtsuka et al., 2015). In this format, multiple different PITT donor plasmids can be included in the microinjection mix: any one of these donors can be inserted at the landing pad in separate founder mice, resulting in independent transgenic mouse lines generated in a single session of microinjection. These latest technical tools, dubbed 'improved PITT' (*i*-PITT), allow up to three transgenic mouse lines to be generated simultaneously, such that each line has a different DOI after a single microinjection session (Ohtsuka et al., 2015). The PITT technology is reviewed in detail in Ohtsuka et al., 2012a and a comprehensive list of available PITT tools was recently described (Schilit et al., 2016). The PITT/*i*-PITT approaches have been used to generate many reliable single-copy transgenic reporter mouse lines that are useful for disease research, including in neuroscience (Madisen et al., 2015) and nephrology (Tsuchida et al., 2016). For example, Tsuchida et al. (2016) reported generating a nephrin-promoter-driven EGFP transgenic mouse model; they further showed that cultured glomeruli from this model serve as tools to screen for compounds that enhance nephrin-promoter activity. Although PITT strategies have overcome the limitations of random transgenesis, a major pitfall of this approach is that custom PITT seed mouse strains need to be generated for a given locus and maintained as breeder colonies as zygote donors for targeted transgenesis.

Despite the technical advances in genetic engineering over the past four decades, one recent and remarkable technical breakthrough is rapidly superseding nearly all of these advances: programmable endonucleases.

### Programmable endonucleases for genome editing

Programmable endonucleases bypass the classical ES-cell-based gene-targeting steps to engineer a precise and heritable mutation at a specific site in the genome. Injection directly into one- or two-cell-stage embryos enables the germline modification of a specific genetic locus without the need for the three complex steps above.

Programmable endonucleases can introduce genetic mutations in one of two ways (Joung and Sander, 2012; Gaj et al., 2013; Sander and Joung, 2014; Cox et al., 2015). They can cause: (i) imprecise, error-prone DNA repair as a result of non-homologous end joining (NHEJ; Box 1) of the cleaved DNA ends; or (ii) the precise repair of cleaved DNA ends by homology-directed repair (HDR; Box 1) via the co-injection of a DNA repair template. Nonetheless, the imprecise insertion of the donor DNA can still occur in HDR-mediated repair. The development of programmable endonucleases for genome editing has opened up a whole new set of technical possibilities to create animal models for biomedical research using virtually any suitable species.

There are four major platforms that employ programmable endonucleases, which were initially discovered in microbiology research applications (Chevalier and Stoddard, 2001; Li et al., 1992; Mojica and Garrett, 2013; Mojica et al., 1993; Römer et al., 2007) and have since been repurposed for editing the genomes of higher animals, including mice. They are, in the order they were developed: homing endonucleases (HEs); zinc-finger nucleases (ZFNs); transcription activator-like effector nucleases (TALENs); and the clustered regularly interspaced short palindromic repeats/CRISPR-associated 9 (CRISPR/Cas9) system (Poster panel 5). Common to all four programmable endonuclease platforms is their sequence-specific nuclease activity, which allows researchers to cleave DNA at a specific target site for genome editing (Joung and Sander, 2012; Gaj et al., 2013; Sander and Joung, 2014; Cox et al., 2015).

The HEs were among the first of the endonucleases (Rouet et al., 1994) to be used for genome manipulation. Although HEs were shown to increase gene-targeting efficiency in ES cells (Smih et al., 1995), there is little evidence to suggest that they have been used successfully to genetically engineer mutant mice. This is probably because of the numerous steps required to design and construct HEs to target specific genomic sites, and because only a small number of genomic sites could be targeted. The ZFNs, unlike HEs, offered greater flexibility as they are easier to engineer and can target more genomic locations than can HEs (Poster panel 5). From 2002 onwards, ZFNs became more widely used than HEs, especially as a research tool in various organisms, including flies, fish and plants (Urnov et al., 2010; Carroll, 2011). The first ZFN-modified mutant mouse models were described in 2010 by Carbery and co-workers via the direct injection of ZFNs that target and inactivate *Mdr1a*, *Jag1* and *Notch3* (Carbery et al., 2010). Nevertheless, the technical complexity of building ZFNs, and intellectual property restrictions, limited their widespread adaptability. TALENs, the next set of programmable nucleases, were developed in 2010 and overcame many of the limitations of HEs and ZFNs. TALENs were simpler, easier to build and could be used to target a greater number of genomic sites than could HEs or ZFNs, and thus were immediately adopted by hundreds of labs as research tools. The first mutant mouse models using TALENs were developed by Sung and co-workers in 2013 via the direct injection of TALENs that targeted *Pibf1* and *Sepw1* to inactivate them (Sung et al., 2013).

At the time when ZFNs and TALENs were being developed, each platform proved to be quite versatile and superior to the previously available genetic engineering tools. Then came the development of the CRISPR/Cas9 genome editing tool in late 2012 and early 2013

(Jinek et al., 2012; Cong et al., 2013; Mali et al., 2013) (Poster panel 5). A series of papers from multiple groups, published within a few months of each other, demonstrated that dsDNA breaks at specific sites in the genome could be generated with very high efficiency in mammalian cells by using guide RNAs complementary to the target site and the Cas9 nuclease (Jinek et al., 2012, 2013; Mali et al., 2013; Cong et al., 2013; Cho et al., 2013). Within just a few months, some groups demonstrated that the RNA-guided Cas9 nuclease system could be used to rapidly generate mutant mouse models (Shen et al., 2013; Wang et al., 2013). Since then, the RNA-guided Cas9 nuclease system has almost completely superseded all other technologies for genome editing. A direct comparison of the RNA-guided Cas9 nuclease system with the previous nuclease-based platforms (HEs, ZFNs and TALENs) clearly shows that it has several advantages (Sander and Joung, 2014; Porteus, 2015; Woolf et al., 2017). These include its simplicity of use, lower cost and higher efficiency. The RNA-guided Cas9 nuclease system is constantly being improved to make it increasingly efficient and versatile, including optimizing and improving the efficiency of existing Cas nucleases (Kleinstiver et al., 2016; Slaymaker et al., 2016), and the development of novel Cas nucleases (Shmakov et al., 2015; Zetsche et al., 2015). The RNA-guided Cas9 nuclease system is considered a 'disruptive' technology because it is quickly making previously well-established and fully developed technologies outdated. In recent years, researchers have come to prefer this approach over ES-cell-based gene-targeting methods (Burgio, 2018; Skarnes, 2015) because RNA-guided Cas9 nuclease approaches are relatively quicker, less expensive and less cumbersome.

The versatility of the RNA-guided Cas9 nuclease system allows researchers to engineer and edit the genome in ways that were previously not possible using non-nuclease-based approaches (Poster panel 5). This includes the ease and speed with which researchers can induce a footprint-free point mutation (Box 1) (Inui et al., 2014; Gurumurthy et al., 2016a). Many human disease conditions are caused by subtle genetic changes, such as point mutations, or by the addition or deletion of a few nucleotides (Gonzaga-Jauregui et al., 2012). Developing animal models of such subtle genetic changes, by using ES-cell-based targeting approaches, inevitably requires the addition of other genetic elements near the vicinity of the genetic change [such as a drug selection marker (neomycin or puromycin) and recombination elements (such as *loxP* or *FRT* sites)]. By contrast, the RNA-guided Cas9 nuclease system can generate animal models with subtle genetic changes with high precision, rapidly, efficiently and without leaving any residual genetic alterations. Compared to previous methods, this capability represents a significant advance in murine genome editing for human disease modeling. The RNA-guided Cas9 nuclease tool has also facilitated the generation of multiple mutant mouse models in a single experiment by inducing dsDNA breaks at multiple target sites, resulting in several different gene disruption models (Wang et al., 2013). The RNA-guided Cas9 nuclease system also enables the generation of mutant mouse models on genetic backgrounds that were not amenable to being genetically manipulated with earlier approaches, such as the immunodeficient NOD/Scid-ILgamma (NSG) strain (Li et al., 2014). The RNA-guided Cas9 nuclease system has also become a powerful tool for both forward and reverse genetics (Gurumurthy et al., 2016c), generating models that are relevant for many diseases, including cancer (Platt et al., 2014). Several recent review articles discuss the Cas9-nuclease-generated mouse models for different disease types, including for cancer (Mou et al., 2015; Roper et al., 2017), cardiovascular diseases (Miano et al., 2016), neurodegenerative

diseases (Yang et al., 2016) and kidney diseases (Higashijima et al., 2017). In addition, several reviews on Cas9-nuclease-generated models have been recently published that discuss their human disease relevance (Dow, 2015; Tschaharganeh et al., 2016; Cai et al., 2016; Yang et al., 2016; Birling et al., 2017).

Despite its advantages, the RNA-guided Cas9 nuclease system poses challenges, such as mosaicism (Yen et al., 2014) and off-target effects. If one of the two haploid genomes in the one-cell-stage zygote is not cleaved before the zygote divides, or if Cas9 activity persists at the two-cell or later stages, additional mutant alleles can be generated, resulting in more than three mutant alleles in the developing offspring. Consequently, as many as six or more types of alleles were detected in one founder (G0) mouse (Li et al., 2013). It is therefore essential to genotype F1 offspring to identify a desired mutant allele. This mosaicism can also be considered an advantage because multiple different alleles can be segregated and used as separate mutant models. For example, the same founder mouse could contain a complete insertion deletion (indel) allele and the foreign cassette knock-in allele; each can be used for different research applications. Because the Cas9 target sequence is only 23 nucleotides long, including the protospacer adjacent motif, it is likely that imperfect target-matching sequences are present elsewhere in the genome that contain one or a few mismatches. Cas9 can potentially bind to such imperfect target sites and thus generate dsDNA breaks and indels at those sites. Indel mutations in off-target sites can have confounding effects in mouse phenotyping experiments. However, off-target effects are not considered a major concern because they: (i) are generally negligible in mice (Iyer et al., 2015); and (ii) can be segregated during mouse breeding. Another recent study, now retracted, reported the presence of high rates of off-target effects in Cas9 engineered mice (Schaefer et al., 2017); however, this report's experimental design and interpretations have been questioned by the scientific community (Kim et al., 2018; Lescarbeau et al., 2018; Nutter et al., 2018; Wilson et al., 2018).

A current challenge to the broader use of RNA-guided Cas9 nuclease is the inability to use it to insert large fragments of DNA reliably and efficiently. Because most genetic-engineering approaches in mice involve the insertion of engineered DNA cassettes, efforts are underway to improve the 'knock-in' capabilities of this system. While a few RNA-guided Cas9 nuclease strategies have been modified to support the insertion of new cassettes (Aida et al., 2015; Maruyama et al., 2015; Sakuma et al., 2016), including a strategy that combines PITT and RNA-guided Cas9 nuclease approaches (Quadros et al., 2015), none has yet been successfully adapted for the routine engineering of the mouse genome. A report from Ohtsuka's group, which used long single-stranded DNA (lssDNA) donors (generated via *in vitro* transcription and reverse transcription), demonstrated that lssDNAs could serve as efficient donors for insertion at the Cas9 cleavage sites (Miura et al., 2015). Another report, which used lssDNAs purified from nicked plasmids to create rat knock-in models, also demonstrated that the lssDNA donor strategy could be a reliable approach for creating insertion alleles (Yoshimi et al., 2016). More recent reports show that co-injecting lssDNA donors with commercially available CRISPR ribonucleoprotein complexes (instead of the previous formats of Cas9 mRNA and sgRNAs), offers a highly robust and efficient strategy for insertion alleles in a method termed *Easi*-CRISPR (efficient additions with ssDNA inserts-CRISPR) (Quadros et al., 2017; Miura et al., 2017).

RNA-guided Cas9 nuclease reagents have also been delivered into zygotes via electroporation of RNA and/or of ribonucleoproteins (Chen et al., 2016; Hashimoto and Takemoto, 2015; Qin et al., 2015).

The ability to deliver RNA-guided Cas9-nuclease gene-editing reagents into several zygotes at once overcomes the need to inject each individual zygote, one at a time, and greatly simplifies the process of generating mouse models. Furthermore, electroporation is less damaging to embryos than microinjection (Chen et al., 2016; Hashimoto and Takemoto, 2015; Qin et al., 2015). Another advance in delivering the RNA-guided Cas9 nuclease system is a method called GONAD (genome editing via oviductal nucleic acids delivery). This procedure delivers Cas9 reagents to embryos in the oviduct using electroporation (Takahashi et al., 2015; Gurumurthy et al., 2016b; Sato et al., 2016; Ohtsuka et al., 2018). Unlike standard approaches, this method does not require any of the three major steps of animal transgenesis: zygote isolation from a female donor; *ex vivo* handling of zygotes (involving either microinjection or electroporation); and the transfer of zygotes to a pseudopregnant female mouse. This approach requires surgical skills that are equivalent to performing the oviductal transfer of embryos. The GONAD method can be used to generate knockout mice (Takahashi et al., 2015), and, by using the so-called improved-GONAD (*i*-GONAD), more complex animal models, such as knock-ins and large-deletion models, can be generated at an efficiency similar to the microinjection-based methods (Ohtsuka et al., 2018). The *i*-GONAD method also uses only a third of the mice used in standard microinjection or in *ex vivo* zygote electroporation methods (Ohtsuka et al., 2018). These methods need not be limited to centralized facilities, sophisticated equipment or highly skilled technical personnel. It is thought that the technical advances such as *Easi*-CRISPR and *i*-GONAD have the potential to entirely reshape the traditional route of generating modified alleles in mice if the techniques are widely adopted by many research groups and by transgenic core facilities (Burgio, 2018).

### Concluding remarks and future perspectives

Recent technological breakthroughs have enabled very rapid changes in the way we generate genetically altered mouse models. Most notably, the RNA-guided Cas9 nuclease system is assuming a key role in shaping this new technological landscape. While the use of the RNA-guided Cas9 nuclease system has transformed and eclipsed traditional transgenic technologies in many ways, challenges remain, including the inability to insert large DNA constructs to generate a knock-in mouse (Box 1) with reporter, conditional or humanized alleles, or to engineer chromosomal rearrangements and other complex alleles easily, routinely and efficiently.

Genetic manipulation also underpins the ongoing efforts to elucidate the functional roles of every gene in the mouse genome, as a first step to understanding the role of 'disease alleles' identified by the exome and genome sequencing of human patients. Genomic and precision medicine depends on our ability to differentiate benign from pathogenic variant alleles, and disease-causing alleles from the longer list of disease-associated ones. Genetic manipulation of the mouse genome is thus essential for understanding gene function and for uncovering the genetic and molecular basis of human disease, leading to improved diagnostic accuracy, development of targeted therapeutics and the implementation of effective prevention strategies.

### At a glance

A high-resolution version of the poster is available for downloading in the online version of this article at <http://dmm.biologists.org/content/12/1/dmm029462/F1.poster.jpg>.

### References

Aida, T., Chiyo, K., Usami, T., Ishikubo, H., Imahashi, R., Wada, Y., Tanaka, K. F., Sakuma, T., Yamamoto, T. and Tanaka, K. (2015). Cloning-free CRISPR/Cas system facilitates functional cassette knock-in in mice. *Genome Biol.* **16**, 87.

- Albert, H., Dale, E. C., Lee, E. and Ow, D. W. (1995). Site-specific integration of DNA into wild-type and mutant lox sites placed in the plant genome. *Plant J. Cell Mol. Biol.* **7**, 649-659.
- Billiard, F., Lobry, C., Darrasse-Jèze, G., Waite, J., Liu, X., Mouquet, H., DaNave, A., Tait, M., Idoyaga, J., Leboeuf, M. et al. (2012). Dll4–Notch signaling in Flt3-independent dendritic cell development and autoimmunity in mice. *J. Exp. Med.* **209**, 1011-1028.
- Birling, M.-C., Heralut, Y. and Pavlovic, G. (2017). Modeling human disease in rodents by CRISPR/Cas9 genome editing. *Mamm. Genome* **28**, 291-301.
- Bockamp, E., Sprengel, R., Eshkind, L., Lehmann, T., Braun, J. M., Emmrich, F. and Hengstler, J. G. (2008). Conditional transgenic mouse models: from the basics to genome-wide sets of knockouts and current studies of tissue regeneration. *Regen. Med.* **3**, 217-235.
- Bouabe, H. and Okkenhaug, K. (2013). Gene targeting in mice: a review. *Methods Mol. Biol.* **1064**, 315-336.
- Bradley, A., Anastassiadis, K., Ayadi, A., Battey, J. F., Bell, C., Birling, M.-C., Bottomley, J., Brown, S. D., Bürger, A., Bult, C. J. et al. (2012). The mammalian gene function resource: the international knockout mouse consortium. *Mamm. Genome* **23**, 580-586.
- Brinster, R. L., Sandgren, E. P., Behringer, R. R. and Palmiter, R. D. (1989). No simple solution for making transgenic mice. *Cell* **59**, 239-241.
- Burgio, G. (2018). Redefining mouse transgenesis with CRISPR/Cas9 genome editing technology. *Genome Biol.* **19**, 27.
- Cai, L., Fisher, A. L., Huang, H. and Xie, Z. (2016). CRISPR-mediated genome editing and human diseases. *Genes Dis.* **3**, 244-251.
- Carberry, I. D., Ji, D., Harrington, A., Brown, V., Weinstein, E. J., Liaw, L. and Cui, X. (2010). Targeted genome modification in mice using zinc-finger nucleases. *Genetics* **186**, 451-459.
- Carroll, D. (2011). Genome engineering with zinc-finger nucleases. *Genetics* **188**, 773-782.
- Chambers, I., Silva, J., Colby, D., Nichols, J., Nijmeijer, B., Robertson, M., Vrana, J., Jones, K., Grotewold, L. and Smith, A. (2007). Nanog safeguards pluripotency and mediates germline development. *Nature* **450**, 1230-1234.
- Chang, H.-S., Lin, C.-H., Chen, Y.-C. and Yu, W. C. Y. (2004). Using siRNA technique to generate transgenic animals with spatiotemporal and conditional gene knockdown. *Am. J. Pathol.* **165**, 1535-1541.
- Chen, S., Lee, B., Lee, A. Y.-F., Modzelewski, A. J. and He, L. (2016). Highly efficient mouse genome editing by CRISPR ribonucleoprotein electroporation of zygotes. *J. Biol. Chem.* **291**, 14457-14467.
- Chen-Tsai, R. Y., Jiang, R., Zhuang, L., Wu, J., Li, L. and Wu, J. (2014). Genome editing and animal models. *Chin. Sci. Bull.* **59**, 1-6.
- Chevalier, B. S. and Stoddard, B. L. (2001). Homing endonucleases: structural and functional insight into the catalysts of intron/intein mobility. *Nucleic Acids Res.* **29**, 3757-3774.
- Chiang, C., Jacobsen, J. C., Ernst, C., Hanscom, C., Heilbut, A., Blumenthal, I., Mills, R. E., Kirby, A., Lindgren, A. M., Rudiger, S. R. et al. (2012). Complex reorganization and predominant non-homologous repair following chromosomal breakage in karyotypically balanced germline rearrangements and transgenic integration. *Nat. Genet.* **44**, 390-397, S1.
- Cho, S. W., Kim, S., Kim, J. M. and Kim, J.-S. (2013). Targeted genome engineering in human cells with the Cas9 RNA-guided endonuclease. *Nat. Biotechnol.* **31**, 230-232.
- Cong, L., Ran, F. A., Cox, D., Lin, S., Barretto, R., Habib, N., Hsu, P. D., Wu, X., Jiang, W., Marraffini, L. A. et al. (2013). Multiplex genome engineering using CRISPR/Cas systems. *Science* **339**, 819-823.
- Cox, D. B. T., Platt, R. J. and Zhang, F. (2015). Therapeutic genome editing: prospects and challenges. *Nat. Med.* **21**, 121-131.
- Dickins, R. A., McJunkin, K., Hernando, E., Premrsirut, P. K., Krizhanovsky, V., Burgess, D. J., Kim, S. Y., Cordon-Cardo, C., Zender, L., Hannon, G. J. et al. (2007). Tissue-specific and reversible RNA interference in transgenic mice. *Nat. Genet.* **39**, 914-921.
- Dickinson, M. E., Flenniken, A. M., Ji, X., Teboul, L., Wong, M. D., White, J. K., Meehan, T. F., Weninger, W. J., Westerberg, H., Adissu, H. et al. (2016). High-throughput discovery of novel developmental phenotypes. *Nature* **537**, 508-514.
- Dow, L. E. (2015). Modeling disease in vivo with CRISPR/Cas9. *Trends Mol. Med.* **21**, 609-621.
- Dubois, N. C., Hofmann, D., Kaloulis, K., Bishop, J. M. and Trumpp, A. (2006). Nestin-Cre transgenic mouse line Nes-Cre1 mediates highly efficient Cre/loxP mediated recombination in the nervous system, kidney, and somite-derived tissues. *Genesis* **44**, 355-360.
- Dymecki, S. M. (1996). Flip recombinase promotes site-specific DNA recombination in embryonic stem cells and transgenic mice. *Proc. Natl. Acad. Sci. USA* **93**, 6191-6196.
- Economides, A. N., Frendewey, D., Yang, P., Dominguez, M. G., Dore, A. T., Lobov, I. B., Persaud, T., Rojas, J., McClain, J., Lengyel, P. et al. (2013). Conditionals by inversion provide a universal method for the generation of conditional alleles. *Proc. Natl. Acad. Sci. USA* **110**, E3179-E3188.
- Feil, R., Brocard, J., Mascrez, B., LeMeur, M., Metzger, D. and Chambon, P. (1996). Ligand-activated site-specific recombination in mice. *Proc. Natl. Acad. Sci. USA* **93**, 10887-10890.
- Fire, A., Xu, S. Q., Montgomery, M. K., Kostas, S. A., Driver, S. E. and Mello, C. C. (1998). Potent and specific genetic interference by double-stranded RNA in *Caenorhabditis elegans*. *Nature* **391**, 806-811.
- Freudenthal, B., Logan, J., Sanger Institute Mouse Pipelines, Croucher, P. I., Williams, G. R. and Bassett, J. H. D. (2016). Rapid phenotyping of knockout mice to identify genetic determinants of bone strength. *J. Endocrinol.* **231**, R31-R46.
- Friedel, R. H. and Soriano, P. (2010). Gene trap mutagenesis in the mouse. *Methods Enzymol.* **477**, 243-269.
- Gaj, T., Gersbach, C. A. and Barbas, C. F. (2013). ZFN, TALEN, and CRISPR/Cas-based methods for genome engineering. *Trends Biotechnol.* **31**, 397-405.
- Gassmann, M., Casagrande, F., Orioli, D., Simon, H., Lai, C., Klein, R. and Lemke, G. (1995). Aberrant neural and cardiac development in mice lacking the ErbB4 neuregulin receptor. *Nature* **378**, 390-394.
- Golub, M. S., Germann, S. L. and Lloyd, K. C. K. (2004). Behavioral characteristics of a nervous system-specific erbB4 knock-out mouse. *Behav. Brain Res.* **153**, 159-170.
- Gonzaga-Jauregui, C., Lupski, J. R. and Gibbs, R. A. (2012). Human genome sequencing in health and disease. *Annu. Rev. Med.* **63**, 35-61.
- Gordon, J. W. and Ruddle, F. H. (1981). Integration and stable germ line transmission of genes injected into mouse pronuclei. *Science* **214**, 1244-1246.
- Gordon, J. W., Scangos, G. A., Plotkin, D. J., Barbosa, J. A. and Ruddle, F. H. (1980). Genetic transformation of mouse embryos by microinjection of purified DNA. *Proc. Natl. Acad. Sci. USA* **77**, 7380-7384.
- Gossen, M. and Bujard, H. (1992). Tight control of gene expression in mammalian cells by tetracycline-responsive promoters. *Proc. Natl. Acad. Sci. USA* **89**, 5547-5551.
- Gu, H., Marth, J. D., Orban, P. C., Mossmann, H. and Rajewsky, K. (1994). Deletion of a DNA polymerase beta gene segment in T cells using cell type-specific gene targeting. *Science* **265**, 103-106.
- Gurumurthy, C. B., Quadros, R. M., Sato, M., Mashimo, T., Lloyd, K. C. K. and Ohtsuka, M. (2016a). CRISPR/Cas9 and the paradigm shift in mouse genome manipulation technologies. In *Genome Editing* (ed. K. Turksen), pp. 65-77. Cham: Springer International Publishing.
- Gurumurthy, C. B., Takahashi, G., Wada, K., Miura, H., Sato, M. and Ohtsuka, M. (2016b). GONAD: a novel CRISPR/Cas9 genome editing method that does not require ex vivo handling of embryos. In *Current Protocols in Human Genetics* (ed. J. L. Haines, B. R. Korf, C. C. Morton, C. E. Seidman, J. G. Seidman and D. R. Smith), pp. 15.8.1-15.8.12. Hoboken, NJ, USA: John Wiley & Sons, Inc.
- Gurumurthy, C. B., Grati, M., Ohtsuka, M., Schilit, S. L. P., Quadros, R. M. and Liu, X. Z. (2016c). CRISPR: a versatile tool for both forward and reverse genetics research. *Hum. Genet.* **135**, 971-976.
- Hadjantonakis, A.-K., Pirty, M. and Nagy, A. (2008). Cre recombinase mediated alterations of the mouse genome using embryonic stem cells. *Methods Mol. Biol.* **461**, 111-132.
- Hara, S. and Takada, S. (2018). Genome editing for the reproduction and remedy of human diseases in mice. *J. Hum. Genet.* **63**, 107-113.
- Hashimoto, M. and Takemoto, T. (2015). Electroporation enables the efficient mRNA delivery into the mouse zygotes and facilitates CRISPR/Cas9-based genome editing. *Sci. Rep.* **5**, 11315.
- Higashijima, Y., Hirano, S., Nangaku, M. and Nureki, O. (2017). Applications of the CRISPR-Cas9 system in kidney research. *Kidney Int.* **92**, 324-335.
- Inui, M., Miyado, M., Igarashi, M., Tamano, M., Kubo, A., Yamashita, S., Asahara, H., Fukami, M. and Takada, S. (2014). Rapid generation of mouse models with defined point mutations by the CRISPR/Cas9 system. *Sci. Rep.* **4**, 5396.
- Iyer, V., Shen, B., Zhang, W., Hodgkins, A., Keane, T., Huang, X. and Skarnes, W. C. (2015). Off-target mutations are rare in Cas9-modified mice. *Nat. Methods* **12**, 479-479.
- Jinek, M., Chylinski, K., Fonfara, I., Hauer, M., Doudna, J. A. and Charpentier, E. (2012). A programmable dual-RNA-guided DNA endonuclease in adaptive bacterial immunity. *Science* **337**, 816-821.
- Jinek, M., East, A., Cheng, A., Lin, S., Ma, E. and Doudna, J. (2013). RNA-programmed genome editing in human cells. *eLife* **2**, e00471.
- Joong, J. K. and Sander, J. D. (2012). TALENs: a widely applicable technology for targeted genome editing. *Nat. Rev. Mol. Cell Biol.* **14**, 49-55.
- Jovčić, A., Ivanisević, V. and Magdić, B. (1990). [Treatment of epilepsy in adults]. *Vojnosanit. Pregl.* **47**, 112-117.
- Justice, M. J. (1999). Mouse ENU Mutagenesis. *Hum. Mol. Genet.* **8**, 1955-1963.
- Justice, M. J. and Dhillon, P. (2016). Using the mouse to model human disease: increasing validity and reproducibility. *Dis. Model. Mech.* **9**, 101-103.
- Justice, M. J., Siracusa, L. D. and Stewart, A. F. (2011). Technical approaches for mouse models of human disease. *Dis. Model. Mech.* **4**, 305-310.
- Kane, K. L., Longo-Guess, C. M., Gagnon, L. H., Ding, D., Salvi, R. J. and Johnson, K. R. (2012). Genetic background effects on age-related hearing loss associated with *Cdh23* variants in mice. *Hear. Res.* **283**, 80-88.
- Karp, N. A., Meehan, T. F., Morgan, H., Mason, J. C., Blake, A., Kurbatova, N., Smedley, D., Jacobsen, J., Mott, R. F., Iyer, V. et al. (2015). Applying the ARRIVE guidelines to an in vivo database. *PLoS Biol.* **13**, e1002151.



- Kilkenny, C., Browne, W. J., Cuthill, I. C., Emerson, M. and Altman, D. G. (2010). Improving bioscience research reporting: the ARRIVE guidelines for reporting animal research. *PLoS Biol.* **8**, e1000412.
- Kim, S.-T., Park, J., Kim, D., Kim, K., Bae, S., Schlesner, M. and Kim, J.-S. (2018). Response to "Unexpected mutations after CRISPR-Cas9 editing in vivo". *Nat. Methods* **15**, 239.
- Kleinhammer, A., Wurst, W. and Kühn, R. (2010). Gene knockdown in the mouse through RNAi. In *Methods in Enzymology* (eds P. M. Wassarman and P. M. Soriano) pp. 387-414. Elsevier.
- Kleinstiver, B. P., Pattanayak, V., Prew, M. S., Tsai, S. Q., Nguyen, N. T., Zheng, Z. and Joung, J. K. (2016). High-fidelity CRISPR-Cas9 nucleases with no detectable genome-wide off-target effects. *Nature* **529**, 490-495.
- Lescarbeau, R. M., Murray, B., Barnes, T. M. and Bermingham, N. (2018). Response to "Unexpected mutations after CRISPR-Cas9 editing in vivo". *Nat. Methods* **15**, 237.
- Lewandoski, M., Wassarman, K. M. and Martin, G. R. (1997). Zp3-cre, a transgenic mouse line for the activation or inactivation of loxP-flanked target genes specifically in the female germ line. *Curr. Biol.* **7**, 148-151.
- Li, L., Wu, L. P. and Chandrasegaran, S. (1992). Functional domains in Fok I restriction endonuclease. *Proc. Natl. Acad. Sci. USA* **89**, 4275-4279.
- Li, D., Qiu, Z., Shao, Y., Chen, Y., Guan, Y., Liu, M., Li, Y., Gao, N., Wang, L., Lu, X. et al. (2013). Heritable gene targeting in the mouse and rat using a CRISPR-Cas system. *Nat. Biotechnol.* **31**, 681-683.
- Li, F., Cowley, D. O., Banner, D., Holle, E., Zhang, L. and Su, L. (2014). Efficient genetic manipulation of the NOD-Rag1-/-IL2RgammaC-null mouse by combining in vitro fertilization and CRISPR/Cas9 technology. *Sci. Rep.* **4**, 5290.
- Liakath-Ali, K., Vancollie, V. E., Heath, E., Smedley, D. P., Estabel, J., Sunter, D., Ditommaso, T., White, J. K., Ramirez-Solis, R., Smyth, I. et al. (2014). Novel skin phenotypes revealed by a genome-wide mouse reverse genetic screen. *Nat. Commun.* **5**, 3540.
- Liang, Q., Conte, N., Skarnes, W. C. and Bradley, A. (2008). Extensive genomic copy number variation in embryonic stem cells. *Proc. Natl. Acad. Sci. USA* **105**, 17453-17456.
- Lin, C.-J., Nasr, Z., Premisrirt, P. K., Porco, J. A., Hippo, Y., Lowe, S. W. and Pelletier, J. (2012). Targeting synthetic lethal interactions between Myc and the eIF4F complex impedes tumorigenesis. *Cell Rep.* **1**, 325-333.
- Liu, C. (2013). Strategies for designing transgenic DNA constructs. In *Lipoproteins and Cardiovascular Disease* (ed. L. A. Freeman), pp. 183-201. Totowa, NJ: Humana Press.
- Liu, G. J., Cimmino, L., Jude, J. G., Hu, Y., Witkowski, M. T., McKenzie, M. D., Kartal-Kaess, M., Best, S. A., Tuohy, L., Liao, Y. et al. (2014). Pax5 loss imposes a reversible differentiation block in B-progenitor acute lymphoblastic leukemia. *Genes Dev.* **28**, 1337-1350.
- Lloyd, K. C. K., Robinson, P. N. and MacRae, C. A. (2016). Animal-based studies will be essential for precision medicine. *Sci. Transl. Med.* **8**, 352ed12.
- Madisen, L., Garner, A. R., Shimaoka, D., Chuong, A. S., Klapoetke, N. C., Li, L., van der Bourg, A., Niino, Y., Ego, L., Monetti, C. et al. (2015). Transgenic mice for intersectional targeting of neural sensors and effectors with high specificity and performance. *Neuron* **85**, 942-958.
- Mali, P., Yang, L., Esvelt, K. M., Aach, J., Guell, M., DiCarlo, J. E., Norville, J. E. and Church, G. M. (2013). RNA-guided human genome engineering via Cas9. *Science* **339**, 823-826.
- Marth, J. D. (1996). Recent advances in gene mutagenesis by site-directed recombination. *J. Clin. Invest.* **97**, 1999-2002.
- Maruyama, T., Dougan, S. K., Truttmann, M. C., Bilate, A. M., Ingram, J. R. and Ploegh, H. L. (2015). Increasing the efficiency of precise genome editing with CRISPR-Cas9 by inhibition of nonhomologous end joining. *Nat. Biotechnol.* **33**, 538-542.
- McBride, J. L., Boudreau, R. L., Harper, S. Q., Staber, P. D., Monteys, A. M., Martins, I., Gilmore, B. L., Burstein, H., Peluso, R. W., Polisky, B. et al. (2008). Artificial miRNAs mitigate shRNA-mediated toxicity in the brain: implications for the therapeutic development of RNAi. *Proc. Natl. Acad. Sci. USA* **105**, 5868-5873.
- McLellan, M. A., Rosenthal, N. A. and Pinto, A. R. (2017). Cre-loxP-mediated recombination: general principles and experimental considerations. *Curr. Protoc. Mouse Biol.* **7**, 1-12.
- Meehan, T. F., Conte, N., West, D. B., Jacobsen, J. O., Mason, J., Warren, J., Chen, C.-K., Tudose, I., Relac, M., Matthews, P. et al. (2017). Disease model discovery from 3,328 gene knockouts by The International Mouse Phenotyping Consortium. *Nat. Genet.* **49**, 1231-1238.
- Miano, J. M., Zhu, Q. M. and Lowenstein, C. J. (2016). A CRISPR path to engineering new genetic mouse models for cardiovascular research. *Arterioscler. Thromb. Vasc. Biol.* **36**, 1058-1075.
- Miura, H., Gurumurthy, C. B., Sato, T., Sato, M. and Ohtsuka, M. (2015). CRISPR/Cas9-based generation of knockdown mice by intronic insertion of artificial microRNA using longer single-stranded DNA. *Sci. Rep.* **5**, 12799.
- Miura, H., Quadros, R. M., Gurumurthy, C. B. and Ohtsuka, M. (2017). Easi-CRISPR for creating knock-in and conditional knockout mouse models using long ssDNA donors. *Nat. Protoc.* **13**, 195-215.
- Mojica, F. J. M. and Garrett, R. A. (2013). Discovery and seminal developments in the CRISPR Field. In *CRISPR-Cas Systems* (ed. R. Barrangou and J. van der Oost), pp. 1-31. Berlin, Heidelberg: Springer Berlin Heidelberg.
- Mojica, F. J. M., Juez, G. and Rodriguez-Valera, F. (1993). Transcription at different salinities of Haloferax mediterranei sequences adjacent to partially modified PstI sites. *Mol. Microbiol.* **9**, 613-621.
- Mou, H., Kennedy, Z., Anderson, D. G., Yin, H. and Xue, W. (2015). Precision cancer mouse models through genome editing with CRISPR-Cas9. *Genome Med.* **7**, 53.
- Mouse Genome Sequencing Consortium (2002). Initial sequencing and comparative analysis of the mouse genome. *Nature* **420**, 520-562.
- Nadeau, J. H., Balling, R., Barsh, G., Beier, D., Brown, S. D., Bucan, M., Camper, S., Carlson, G., Copeland, N., Eppig, J. et al. (2001). Sequence interpretation. Functional annotation of mouse genome sequences. *Science* **291**, 1251-1255.
- Nagy, A. (2000). Cre recombinase: the universal reagent for genome tailoring. *Genesis* **26**, 99-109.
- Nern, A., Pfeiffer, B. D., Svoboda, K. and Rubin, G. M. (2011). Multiple new site-specific recombinases for use in manipulating animal genomes. *Proc. Natl. Acad. Sci. USA* **108**, 14198-14203.
- Nutter, L. M. J., Heaney, J. D., Lloyd, K. C. K., Murray, S. A., Seavitt, J. R., Skarnes, W. C., Teboul, L., Brown, S. D. M. and Moore, M. (2018). Response to "Unexpected mutations after CRISPR-Cas9 editing in vivo". *Nat. Methods* **15**, 235-236.
- Ohtsuka, M., Ogiwara, S., Miura, H., Mizutani, A., Warita, T., Sato, M., Imai, K., Hozumi, K., Sato, T., Tanaka, M. et al. (2010). Pronuclear injection-based mouse targeted transgenesis for reproducible and highly efficient transgene expression. *Nucleic Acids Res.* **38**, e198.
- Ohtsuka, M., Miura, H., Sato, M., Kimura, M., Inoko, H. and Gurumurthy, C. B. (2012a). PITT: pronuclear injection-based targeted transgenesis, a reliable transgene expression method in mice. *Exp. Anim. Jpn. Assoc. Lab. Anim. Sci.* **61**, 489-502.
- Ohtsuka, M., Miura, H., Nakaoka, H., Kimura, M., Sato, M. and Inoko, H. (2012b). Targeted transgenesis through pronuclear injection of improved vectors into in vitro fertilized eggs. *Transgenic Res.* **21**, 225-226.
- Ohtsuka, M., Miura, H., Mochida, K., Hirose, M., Hasegawa, A., Ogura, A., Mizutani, R., Kimura, M., Isotani, A., Ikawa, M. et al. (2015). One-step generation of multiple transgenic mouse lines using an improved Pronuclear Injection-based Targeted Transgenesis (i-PITT). *BMC Genomics* **16**, 274.
- Ohtsuka, M., Sato, M., Miura, H., Takabayashi, S., Matsuyama, M., Koyano, T., Arifin, N., Nakamura, S., Wada, K. and Gurumurthy, C. B. (2018). i-GONAD: a robust method for in situ germline genome engineering using CRISPR nucleases. *Genome Biol.* **19**, 25.
- Palmiter, R. D., Brinster, R. L., Hammer, R. E., Trumbauer, M. E., Rosenfeld, M. G., Birnberg, N. C. and Evans, R. M. (1982a). Dramatic growth of mice that develop from eggs microinjected with metalloproteinase-growth hormone fusion genes. *Nature* **300**, 611-615.
- Peng, S., York, J. P. and Zhang, P. (2006). A transgenic approach for RNA interference-based genetic screening in mice. *Proc. Natl. Acad. Sci. USA* **103**, 2252-2256.
- Perlman, R. L. (2016). Mouse models of human disease: an evolutionary perspective. *Evol. Med. Public Health* **2016**, 170-176.
- Perrin, S. (2014). Preclinical research: make mouse studies work. *Nature* **507**, 423-425.
- Piedrahita, J. A., Dunne, P., Lee, C.-K., Moore, K., Rucker, E. and Vazquez, J. C. (1999). Use of embryonic and somatic cells for production of transgenic domestic animals. *Cloning* **1**, 73-87.
- Platt, R. J., Chen, S., Zhou, Y., Yim, M. J., Swiech, L., Kempton, H. R., Dahlman, J. E., Parnas, O., Eisenhaure, T. M., Jovanovic, M. et al. (2014). CRISPR-Cas9 knockin mice for genome editing and cancer modeling. *Cell* **159**, 440-455.
- Porteus, M. H. (2015). Towards a new era in medicine: therapeutic genome editing. *Genome Biol.* **16**, 286.
- Premisrirt, P. K., Dow, L. E., Kim, S. Y., Camiolo, M., Malone, C. D., Miething, C., Scuoppo, C., Zuber, J., Dickins, R. A., Kogan, S. C. et al. (2011). A rapid and scalable system for studying gene function in mice using conditional RNA interference. *Cell* **145**, 145-158.
- Pulina, M. V., Sahr, K. E., Nowotzsch, S., Baron, M. H. and Hadjantonakis, A.-K. (2014). A conditional mutant allele for analysis of Mixl1 function in the mouse. *Genesis* **52**, 417-423.
- Qin, W., Dion, S. L., Kutny, P. M., Zhang, Y., Cheng, A. W., Jillette, N. L., Malhotra, A., Geurts, A. M., Chen, Y.-G. and Wang, H. (2015). Efficient CRISPR/Cas9-mediated genome editing in mice by zygote electroporation of nuclease. *Genetics* **200**, 423-430.
- Quadros, R. M., Harms, D. W., Ohtsuka, M. and Gurumurthy, C. B. (2015). Insertion of sequences at the original provirus integration site of mouse ROSA26 locus using the CRISPR/Cas9 system. *FEBS Open Biol.* **5**, 191-197.
- Quadros, R. M., Miura, H., Harms, D. W., Akatsuka, H., Sato, T., Aida, T., Redder, R., Richardson, G. P., Inagaki, Y., Sakai, D. et al. (2017). Easi-CRISPR: a robust method for one-step generation of mice carrying conditional and insertion alleles using long ssDNA donors and CRISPR ribonucleoproteins. *Genome Biol.* **18**, 92.

- Rajewsky, K., Gu, H., Kühn, R., Betz, U. A., Müller, W., Roes, J. and Schwenk, F. (1996). Conditional gene targeting. *J. Clin. Invest.* **98**, 600-603.
- Rickert, R. C., Roes, J. and Rajewsky, K. (1997). B lymphocyte-specific, Cre-mediated mutagenesis in mice. *Nucleic Acids Res.* **25**, 1317-1318.
- Römer, P., Hahn, S., Jordan, T., Strauss, T., Bonas, U. and Lahaye, T. (2007). Plant pathogen recognition mediated by promoter activation of the pepper Bs3 resistance gene. *Science* **318**, 645-648.
- Roper, J., Tammela, T., Cetinbas, N. M., Akkad, A., Roghanian, A., Rickelt, S., Almqdadi, M., Wu, K., Oberli, M. A., Sánchez-Rivera, F. et al. (2017). In vivo genome editing and organoid transplantation models of colorectal cancer and metastasis. *Nat. Biotechnol.* **35**, 569-576.
- Rosen, B., Schick, J. and Wurst, W. (2015). Beyond knockouts: the International Knockout Mouse Consortium delivers modular and evolving tools for investigating mammalian genes. *Mamm. Genome Off. J. Int. Mamm. Genome Soc.* **26**, 456-466.
- Rosenthal, N. and Brown, S. (2007). The mouse ascending: perspectives for human-disease models. *Nat. Cell Biol.* **9**, 993-999.
- Rouet, P., Smih, F. and Jasin, M. (1994). Expression of a site-specific endonuclease stimulates homologous recombination in mammalian cells. *Proc. Natl. Acad. Sci. USA* **91**, 6064-6068.
- Russell, W. L., Kelly, E. M., Hunsicker, P. R., Bangham, J. W., Maddux, S. C. and Phipps, E. L. (1979). Specific-locus test shows ethylnitrosourea to be the most potent mutagen in the mouse. *Proc. Natl. Acad. Sci. USA* **76**, 5818-5819.
- Sakuma, T., Nakade, S., Sakane, Y., Suzuki, K.-I. T. and Yamamoto, T. (2016). MMEJ-assisted gene knock-in using TALENs and CRISPR-Cas9 with the PITCh systems. *Nat. Protoc.* **11**, 118-133.
- Sander, J. D. and Joung, J. K. (2014). CRISPR-Cas systems for editing, regulating and targeting genomes. *Nat. Biotechnol.* **32**, 347-355.
- Sato, M., Ohtsuka, M., Watanabe, S. and Gurumurthy, C. B. (2016). Nucleic acids delivery methods for genome editing in zygotes and embryos: the old, the new, and the old-new. *Biol. Direct* **11**, 16.
- Sauer, B. (1998). Inducible gene targeting in mice using the Cre/lox system. *Methods* **14**, 381-392.
- Schaefer, K. A., Wu, W.-H., Colgan, D. F., Tsang, S. H., Bassuk, A. G. and Mahajan, V. B. (2017). Unexpected mutations after CRISPR-Cas9 editing in vivo. *Nat. Methods* **14**, 547-548.
- Schilit, S. L. P., Ohtsuka, M., Quadros, R. M. and Gurumurthy, C. B. (2016). Pronuclear injection-based targeted transgenesis: pronuclear injection-based targeted transgenesis. In *Current Protocols in Human Genetics* (ed. J. L. Haines, B. R. Korf, C. C. Morton, C. E., Seidman, J. G. Seidman and D. R. Smith), p. 15.10.1-15.10.28. Hoboken, NJ, USA: John Wiley & Sons, Inc.
- Seibler, J., Kleinridders, A., Küter-Luks, B., Niehaves, S., Brüning, J. C. and Schwenk, F. (2007). Reversible gene knockdown in mice using a tight, inducible shRNA expression system. *Nucleic Acids Res.* **35**, e54.
- Shakya, R., Szabolcs, M., McCarthy, E., Ospina, E., Basso, K., Nandula, S., Murty, V., Baer, R. and Ludwig, T. (2008). The basal-like mammary carcinomas induced by Brca1 or Bard1 inactivation implicate the BRCA1/BARD1 heterodimer in tumor suppression. *Proc. Natl. Acad. Sci. USA* **105**, 7040-7045.
- Shen, W., Lan, G., Yang, X., Li, L., Min, L., Yang, Z., Tian, L., Wu, X., Sun, Y., Chen, H. et al. (2007). Targeting the exogenous htpAm gene on goat somatic cell beta-casein locus for transgenic goat production. *Mol. Reprod. Dev.* **74**, 428-434.
- Shen, B., Zhang, J., Wu, H., Wang, J., Ma, K., Li, Z., Zhang, X., Zhang, P. and Huang, X. (2013). Generation of gene-modified mice via Cas9/RNA-mediated gene targeting. *Cell Res.* **23**, 720-723.
- Shmakov, S., Abudayyeh, O. O., Makarova, K. S., Wolf, Y. I., Gootenberg, J. S., Semenova, E., Minakhin, L., Joung, J., Konermann, S., Severinov, K. et al. (2015). Discovery and functional characterization of diverse class 2 CRISPR-Cas systems. *Mol. Cell* **60**, 385-397.
- Silver, L. M. (2001). Mice as experimental organisms. In *eLS* (ed. John Wiley & Sons, Ltd), pp. 1-5. Chichester: John Wiley & Sons, Ltd.
- Skarnes, W. C. (2015). Is mouse embryonic stem cell technology obsolete? *Genome Biol.* **16**, 109.
- Skarnes, W. C., Rosen, B., West, A. P., Koutsourakis, M., Bushell, W., Iyer, V., Mujica, A. O., Thomas, M., Harrow, J., Cox, T. et al. (2011). A conditional knockout resource for the genome-wide study of mouse gene function. *Nature* **474**, 337-342.
- Slymaker, I. M., Gao, L., Zetsche, B., Scott, D. A., Yan, W. X. and Zhang, F. (2016). Rationally engineered Cas9 nucleases with improved specificity. *Science* **351**, 84-88.
- Smih, F., Rouet, P., Romanienko, P. J. and Jasin, M. (1995). Double-strand breaks at the target locus stimulate gene targeting in embryonic stem cells. *Nucleic Acids Res.* **23**, 5012-5019.
- Soriano, P. (1999). Generalized lacZ expression with the ROSA26 Cre reporter strain. *Nat. Genet.* **21**, 70-71.
- Su, H., Mills, A. A., Wang, X. and Bradley, A. (2002). A targeted X-linked CMV-Cre line. *Genesis* **32**, 187-188.
- Sung, Y. H., Baek, I.-J., Kim, D. H., Jeon, J., Lee, J., Lee, K., Jeong, D., Kim, J.-S. and Lee, H.-W. (2013). Knockout mice created by TALEN-mediated gene targeting. *Nat. Biotechnol.* **31**, 23-24.
- Takahashi, G., Gurumurthy, C. B., Wada, K., Miura, H., Sato, M. and Ohtsuka, M. (2015). GONAD: genome-editing via Oviductal Nucleic Acids Delivery system: a novel microinjection independent genome engineering method in mice. *Sci. Rep.* **5**, 11406.
- Tasic, B., Hippenmeyer, S., Wang, C., Gamboa, M., Zong, H., Chen-Tsai, Y. and Luo, L. (2011). Site-specific integrase-mediated transgenesis in mice via pronuclear injection. *Proc. Natl. Acad. Sci. USA* **108**, 7902-7907.
- Testa, G., Schaft, J., van der Hoeven, F., Glaser, S., Anastassiadis, K., Zhang, Y., Hermann, T., Stremmel, W. and Stewart, A. F. (2004). A reliable lacZ expression reporter cassette for multipurpose, knockout-first alleles. *Genesis* **38**, 151-158.
- Thomas, K. R. and Capecchi, M. R. (1986). Targeting of genes to specific sites in the mammalian genome. *Cold Spring Harb. Symp. Quant. Biol.* **51**, 1101-1113.
- Thomas, K. R. and Capecchi, M. R. (1987). Site-directed mutagenesis by gene targeting in mouse embryo-derived stem cells. *Cell* **51**, 503-512.
- Thompson, S., Clarke, A. R., Pow, A. M., Hooper, M. L. and Melton, D. W. (1989). Germ line transmission and expression of a corrected HPRT gene produced by gene targeting in embryonic stem cells. *Cell* **56**, 313-321.
- Tiscornia, G., Singer, O., Ikawa, M. and Verma, I. M. (2003). A general method for gene knockdown in mice by using lentiviral vectors expressing small interfering RNA. *Proc. Natl. Acad. Sci. USA* **100**, 1844-1848.
- Tschaharganeh, D. F., Lowe, S. W., Garippa, R. J. and Livshits, G. (2016). Using CRISPR/Cas to study gene function and model disease *in vivo*. *FEBS J.* **283**, 3194-3203.
- Tsuchida, J., Matsusaka, T., Ohtsuka, M., Miura, H., Okuno, Y., Asanuma, K., Nakagawa, T., Yanagita, M. and Mori, K. (2016). Establishment of Neph1 reporter mice and use for chemical screening. *PLoS ONE* **11**, e0157497.
- Urnov, F. D., Rebar, E. J., Holmes, M. C., Zhang, H. S. and Gregory, P. D. (2010). Genome editing with engineered zinc finger nucleases. *Nat. Rev. Genet.* **11**, 636-646.
- Venter, J. C., Adams, M. D., Myers, E. W., Li, P. W., Mural, R. J., Sutton, G. G., Smith, H. O., Yandell, M., Evans, C. A., Holt, R. A. et al. (2001). The sequence of the human genome. *Science* **291**, 1304-1351.
- Wang, H., Yang, H., Shivalila, C. S., Dawlaty, M. M., Cheng, A. W., Zhang, F. and Jaenisch, R. (2013). One-step generation of mice carrying mutations in multiple genes by CRISPR/Cas-mediated genome engineering. *Cell* **153**, 910-918.
- Wilson, C. J., Fennell, T., Bothmer, A., Maeder, M. L., Reyon, D., Cotta-Ramusino, C., Fernandez, C. A., Marco, E., Barrera, L. A., Jayaram, H. et al. (2018). Response to "Unexpected mutations after CRISPR-Cas9 editing in vivo". *Nat. Methods* **15**, 236-237.
- Woolf, T. M., Gurumurthy, C. B., Boyce, F. and Kmiec, E. B. (2017). To cleave or not to cleave: therapeutic gene editing with and without programmable nucleases. *Nat. Rev. Drug Discov.* **16**, 296.
- Xu, X., Wagner, K.-U., Larson, D., Weaver, Z., Li, C., Ried, T., Hennighausen, L., Wynshaw-Boris, A. and Deng, C.-X. (1999). Conditional mutation of Brca1 in mammary epithelial cells results in blunted ductal morphogenesis and tumour formation. *Nat. Genet.* **22**, 37-43.
- Yamamoto-Hino, M. and Goto, S. (2013). In vivo RNAi-based screens: studies in model organisms. *Genes* **4**, 646-665.
- Yang, W., Tu, Z., Sun, Q. and Li, X.-J. (2016). CRISPR/Cas9: implications for modeling and therapy of neurodegenerative diseases. *Front. Mol. Neurosci.* **9**, 30.
- Yen, S.-T., Zhang, M., Deng, J. M., Usman, S. J., Smith, C. N., Parker-Thornburg, J., Swinton, P. G., Martin, J. F. and Behringer, R. R. (2014). Somatic mosaicism and allele complexity induced by CRISPR/Cas9 RNA injections in mouse zygotes. *Dev. Biol.* **393**, 3-9.
- Yoshimi, K., Kunihiro, Y., Kaneko, T., Nagahora, H., Voigt, B. and Mashimo, T. (2016). ssODN-mediated knock-in with CRISPR-Cas for large genomic regions in zygotes. *Nat. Commun.* **7**, 10431.
- Zetsche, B., Gootenberg, J. S., Abudayyeh, O. O., Slymaker, I. M., Makarova, K. S., Essletzbichler, P., Volz, S. E., Joung, J., van der Oost, J., Regev, A. et al. (2015). Cpf1 is a single RNA-guided endonuclease of a Class 2 CRISPR-Cas system. *Cell* **163**, 759-771.
